1 **The names of the authors**

2 Aru Toyoda<sup>1,2</sup>, Kazunari Matsudaira<sup>3</sup>, Tamaki Maruhashi<sup>4</sup>, Suchinda Malaivijitnond<sup>3,5</sup> and Yoshi  
3 Kawamoto<sup>6</sup>

4

5 **Title**

6 Highly Versatile, Non-Invasive Method for Collecting Buccal DNA from Free-Ranging Non-Human  
7 Primates

8

9 **The affiliations and addresses of the authors**

10 <sup>1</sup> Primate Research Institute, Kyoto University, Inuyama, Aichi, Japan

11 <sup>2</sup> Chubu University Academy of Emerging Sciences, Kasugai, Aichi, Japan

12 <sup>3</sup> Department of Biology, Faculty of Science, Chulalongkorn University, Bangkok, Thailand

13 <sup>4</sup> Department of Human Cultures, Musashi University, Tokyo, Japan

14 <sup>5</sup> National Primate Research Center of Thailand, Chulalongkorn University, Saraburi, Thailand

15 <sup>6</sup> Graduate School of Veterinary Medicine and Life Science, Nippon Veterinary and Life Science  
16 University, Tokyo, Japan

17

18 **The e-mail address, and telephone number of the corresponding author**

19 Aru Toyoda : [atoyoda.pri.kyoto-u@outlook.com](mailto:atoyoda.pri.kyoto-u@outlook.com)

20

21 **ABSTRACT**

22 Non-invasive techniques for collection of DNA samples of suitable quality and quantity are important for  
23 improving the efficiency of genetic wildlife research. The development of a non-invasive method for  
24 collection of DNA samples from wild stump-tailed macaques (*Macaca arctoides*) is described herein.

25 Polyester rope was cut into 10 cm pieces, which were then soaked in a 20% sugar solution to bait

26 individuals. Rope swabs were immediately collected and transferred to a lysis buffer solution after  
27 subjects had picked up, chewed, and discarded them. DNA was later extracted from the buffer.  
28 Quantitative real-time PCR and both allelic dropout and genotype failure rates were used to compare the  
29 quantity and quality of the buccal DNA samples to those of intestinal slough cell DNA samples collected  
30 from freshly dropped feces. The buccal samples yielded significantly more DNA ( $27.1 \pm 33.8$  ng/ $\mu$ L) than  
31 did the fecal samples ( $11.4 \pm 15.4$  ng/ $\mu$ L) and exhibited lower allelic dropout and genotyping failure rates  
32 for the 10 autosomal microsatellites investigated. Buccal cell collection was also simple, inexpensive,  
33 reliable, and less time-consuming compared to fecal sampling. Thus, this method should facilitate  
34 genome-wide studies of non-human primates and other wildlife species.

35

### 36 **Keywords**

37 Non-invasive DNA collection, Microsatellite markers, Quantitative real-time PCR, Allelic dropout

38

### 39 **Acknowledgments**

40 We are grateful to Warayut Nilpaung, Chuchat Choklap, the superintendent of the Khao Krapuk Khao  
41 Taomor Non-Hunting Area. Phanlerd Inprasoet, Wanchai Inprasoet, and Napatchaya Techaatiwatkun for  
42 providing a great deal of support in the continued success of this fieldwork; Dr. Yuzuru Hamada, Dr.  
43 Hiroki Koda, Dr. Ikuma Adachi, and Dr. Takeshi Nishimura for their supports in our research. This study  
44 was funded by the Japan Society for the Promotion of Science KAKENHI (#16J0098 to AT), a Young  
45 Science Explorer Grant from the National Geographic Foundation for Science and Exploration - Asia  
46 (#Asia-22-15 to AT), Kyoto University Foundation (to AT), and the Cooperation Research Program of the  
47 Wildlife Research Center, Kyoto University (#2015-Jiyuu-8 to AT).

48

49 **Introduction**

50 Wildlife, including non-human primates, has been subject to genetic analyses  
51 in a wide variety of research fields, such as evolutionary biology (e.g., Blancher et al.  
52 2008, Osada et al. 2015, Tosi et al. 2002), population genetics (e.g., Evans et al. 2001,  
53 Kanthaswamy et al. 2013, Trask et al. 2013), phylogeography (e.g., Bunlungsup et al.  
54 2016), pedigree analysis (e.g., Barelli et al. 2013), and conservation biology (e.g.,  
55 Minhós et al. 2013), using a variety of DNA markers. Mitochondrial DNA (mtDNA),  
56 for example, is generally used for investigating maternal relationships and  
57 phylogeography (Avice 2004), whereas Y-chromosome genes of mammals are used to  
58 investigate paternal relationships and male dispersal (Tosi et al. 2000, Tosi et al. 2002).  
59 Meanwhile, autosomal markers, such as microsatellite and single-nucleotide  
60 polymorphism (SNP) markers, are often used to investigate population genetics and  
61 genomic diversity (Bruford and Wayne 1993, Brumfield et al. 2003).

62 As a result of recent advances in DNA analysis technology and growing  
63 concerns over animal welfare (Russell and Burch 1959), genetic studies of wildlife  
64 frequently use DNA samples that have been collected by non-invasive means (e.g.  
65 Woodruff 1993, Taberlet et al. 1999). For example, DNA samples have been collected  
66 from egg shells (herring gull, *Larus argentatus*; Egloff et al. 2009), blood-fed mosquitos

67 (Ejiri et al. 2011), koala feces (*Phascolarctos cinereus*; Wedrowicz et al. 2013), and  
68 bug-bite blood (Sumatran rhinoceros, *Dicerorhinus sumatrensis*; Rovie-Ryan et al.  
69 2013). DNA has similarly been collected non-invasively in genetic studies of wild,  
70 non-human primates, for example, from trapped hairs (white-headed langur,  
71 *Trachypithecus leucocephalus*; Wang et al. 2016), semen (Japanese macaques, *Macaca*  
72 *fuscata*; Domingo-Roura et al. 2004), urine (Japanese macaques; Hayakawa and  
73 Takenaka 1999), and saliva (mountain gorillas, *Gorilla beringei beringei*, and Grauer's  
74 gorillas, *Gorilla beringei graueri*; Smiley et al. 2010, Chimpanzee, *Pan troglodytes*,  
75 Inoue et al. 2007). Among these DNA resources, fecal samples have been most  
76 commonly used (Blair and Melnick 2011, Buchan et al. 2003, Nietlisbach et al. 2012,  
77 Städele et al. 2015, Vigilant et al. 2001). However, fecal samples generally yield low  
78 quantities of low-quality DNA, and even though the markers used in some studies (e.g.,  
79 mtDNA markers) can be amplified successfully owing to their high copy numbers  
80 (Bunlungsup et al. 2016), enormous efforts are required when examining nuclear markers  
81 (Navidi et al. 1992, Taberlet et al. 1996). One major problem with using fecal DNA  
82 samples for nuclear genotyping is allelic dropout, a phenomenon in which one of two  
83 autosomal alleles is not amplified by PCR, causing heterozygous genotypes to be  
84 misinterpreted as homozygous (Pompanon et al. 2005, Tebbutt and Ruan 2008). Allelic

85 dropout is problematic in paternity and kinship analyses using autosomal microsatellites  
86 (Vigilant et al. 2001).

87 As such, development of non-invasive DNA sampling methods that allow  
88 researchers to obtain large quantities of high-quality DNA samples with low levels of  
89 contamination is needed. Buccal cell collection methods, such as collecting sugarcane  
90 wedges or pith of terrestrial herbaceous vegetation after their chewing by wild bonobos  
91 (*Pan paniscus*, Hashimoto et al. 1996, Ishizuka et al. 2018), taking oral swabs from  
92 anesthetized mountain and Grauer's gorillas (Smiley et al. 2010), and attaching ropes to  
93 saliva-collecting devices near free-ranging Tibetan macaques (*Macaca thibetana*,  
94 Simons et al. 2012), have been reported previously. Collecting DNA from wedges of  
95 sugar cane or other plants is a non-invasive method that does not require manipulation  
96 of animals and is thus applicable to other study sites with appropriate modification  
97 according to certain factors, such as the environment of the study and the feeding  
98 patterns of the subjects. However, methods that require anesthesia are impossible in  
99 most of field studies, and methods that require specialized equipment takes time and  
100 cost to produce the device. Especially, in the wild condition, using specific devices is  
101 less flexible to collect multiple samples from several monkeys at once due to mobilities.  
102 Such methods were inapplicable to the stump-tailed macaques at our study site because

103 of the difficulty in preparation and storage of the bite materials. Thus, we designed  
104 another method for collecting buccal cells reporting here.

105         Herein, a non-invasive method for collecting buccal DNA samples using rope  
106 swabs is described as simple, reliable, inexpensive, and less time-consuming than other  
107 commonly used methods. To test the effectiveness of this method, two experiments  
108 were conducted. The first was a quantitative comparative test of host DNA in 41 fecal  
109 and 41 buccal DNA samples randomly selected using real-time PCR. In addition, gel  
110 electrophoresis (“gel tests”) were also used to quantitatively test DNA samples cheaply  
111 and conveniently, and their results were compared with those of costlier real-time PCR  
112 to verify their accuracy. The second experiment was a qualitative comparison based on  
113 allelic dropout and genotype failure rates in 30 fecal and 30 buccal DNA samples  
114 selected using gel tests.

115

## 116 **Materials and methods**

### 117 *Study site*

118 The present study was conducted at the Khao Krapuk Khao Taomor Non-Hunting Area,  
119 Phetchaburi Province, Thailand (12°47'59.2" N, 99°44'31.1" E), which harbors five  
120 free-ranging groups of stump-tailed macaques (*Macaca arctoides*). There are five

121 groups: Ting group, 115 individuals; Nadam group, 91 individuals; Third group, 71  
122 individuals; Fourth group, 75 individuals; Wngklm group, 43 individuals (Toyoda and  
123 Malaivijitnond 2018). This survey area is mainly a mountainous area composed of  
124 secondary forests and bamboo forests, and open areas coexist including temple and  
125 houses of local people. The moving area of monkeys was divided between north and  
126 south by large roads, and food provisioning by locals or visitors was occasionally  
127 observed along the road or at temple ground. As information on environmental  
128 conditions, mean annual temperature and annual rainfall are 27°C and 1070 mm,  
129 respectively, in the data of the nearby national park, named Keang Krachan National  
130 Park, about 30km far from this study site (Wijitkosum 2012). This site consists  
131 primarily of secondary forest, including stands of bamboo and agricultural areas. Food  
132 provisioning by locals or visitors was occasionally observed.

133

#### 134 *Collection and extraction of DNA samples*

135 Buccal cells were collected using baited ropes (hereafter *rope swabs*). Polyester ropes (6  
136 mm in diameter; Takagi Corporation, Kagawa, Japan, JAN code: 4943 956 261 513)  
137 were cut into approximately 10 cm pieces, autoclaved, and dried (Figure 1). To bait  
138 individuals, the rope swabs were soaked in a 20% sugar solution (70 g cane sugar

139 dissolved in 350 mL distilled water) for at least 30 min, and then scattered on the open  
140 ground where the monkeys were found. After being chewed (Figure 2) and discarded by  
141 a monkey, the rope swab was quickly collected and transferred to a 5 mL carrying tube  
142 containing 3 mL lysis buffer (0.5 % (w/v) in SDS, 100 mM EDTA pH 8.0, 100 mM  
143 Tris-HCl pH 8.0, and 10 mM NaCl) (Hayaishi and Kawamoto 2006). To compare the  
144 quantity and quality of the buccal DNA with that of other commonly used DNA sources,  
145 intestinal slough cells from freshly dropped fecal samples were also collected. A sterile  
146 cotton bud, which was soaked in 2 mL lysis buffer, was used to swab the surfaces of  
147 feces, following the protocol of Bunlungsup et al. (2016). To increase DNA yields, the  
148 surfaces of the feces were swabbed at least three times.

149         The buccal and intestinal cells that were transferred to the lysis buffer were  
150 kept at room temperature for at least five months until DNA extraction. DNA was  
151 extracted following the procedure of Kawamoto et al. (2013). Potential PCR inhibitors  
152 were removed by adding 600 mg of hydrolyzed starch (Wako, Osaka, Japan) to 1.5 mL  
153 of lysis buffer per sample. The samples were incubated at 36 °C for 10 min, and then  
154 centrifuged at 1000 ×g for 15 min. Finally, 750 µL of each supernatant was processed  
155 using a commercially available DNA clean-up system (Wizard SV Gel and PCR  
156 Clean-Up System; Promega, Madison, WI, USA), and the DNA was finally eluted with



157 50  $\mu$ L pure water. Study had been conducted from September 25<sup>th</sup>, 2015 to June 15<sup>th</sup>,  
158 2017, and 74 fecal samples and 579 buccal samples were collected.

159

#### 160 *DNA quantification*

161 The amount of host DNA was quantified by quantitative real-time PCR (Morin  
162 et al. 2001). Forty-one DNA samples extracted from buccal and 41 from fecal samples  
163 were selected randomly from all of the extracted DNA samples. The real-time PCR  
164 method was used because both the buccal and intestinal DNA samples were  
165 contaminated with other exotic DNA sources, such as bacteria, eukaryotic parasites, and  
166 dietary materials (e.g., plants, insects, or small animals), which could not be  
167 differentiated using conventional spectrophotometry. The sequences of the real-time  
168 PCR primers and *c-myc* probe were 5'-GCCAGAGGAGGAACGAGCT-3'  
169 (CMYC\_E3\_F1U1), 5'-GGGCCTTTTCATTGTTTTCCA-3' (CMYC\_E3\_R1U1), and  
170 5'-FAM-TGCCCTGCGTGACCAGATCC-TAMRA-3' (CMYC\_E3\_TMV),  
171 respectively (Morin et al. 2001). Real-time PCR was performed using a StepOnePlus  
172 real-time PCR System (Thermo Fisher Scientific, Waltham, MA, USA), and each 20  $\mu$ L  
173 reaction contained 2  $\mu$ L DNA template, 1 $\times$  TaqMan Fast Advanced Master Mix  
174 (Thermo Fisher Scientific), 250 nM probe, and 900 nM of each primer. In addition, the

175 PCR amplification conditions included an initial denaturation step of 95 °C for 20 s,  
176 followed by 45 cycles of 95 °C for 1 s and 60 °C for 20 s. Host DNA quantity  
177 (concentration) was determined using a standard curve made by a duplicate set of DNA  
178 with known quantity. The standard set was made from DNA extracted from the blood of  
179 a northern pig-tailed macaque (*Macaca leonina*) reared in the Primate Research Unit,  
180 Chulalongkorn University (Bangkok, Thailand). The DNA was quantified using a  
181 spectrophotometer and diluted to 10 ng/μL, 2.5 ng/μL, 625 pg/μL, 156 pg/μL, 39.1  
182 pg/μL, and 9.8 pg/μL with deionized water. The mean DNA yields obtained from the  
183 buccal and fecal samples were compared using the Wilcoxon rank sum test in R Ver.  
184 3.4.2 (R Core Team 2016).

185 Real-time PCR provides an accurate host DNA concentration for each DNA  
186 sample, and thus was appropriate for comparing the DNA yields of the buccal and fecal  
187 samples. However, real-time PCR analysis is expensive. Therefore, to select suitable  
188 samples for microsatellite genotyping, the usability of the 82 DNA samples was roughly  
189 screened using conventional PCR and agarose gel electrophoresis following the  
190 procedure of Kawamoto et al. (2013) and Ball et al. (2007) (gel electrophoresis). For the  
191 gel test, the *c-myc* gene was PCR-amplified in 12.5 μL reactions of 1 μL template DNA,  
192 1× PCR Buffer for KOD FX, 400 μM dNTPs, 0.25 U KOD FX (Toyobo, Osaka, Japan),

193 and 0.015 pM of both the forward and reverse real-time PCR primers, using the  
194 following conditions: initial denaturation step of 94 °C for 2 min, 45 cycles of 98 °C for  
195 10 s, 58 °C for 30 s, and 68 °C for 30 s. The resulting amplicons were electrophoresed  
196 on 2% agarose-TAE gels, stained with SYBR Safe DNA Gel Stain (Thermo Fisher  
197 Scientific), and visualized using UV transilluminators to determine the intensity of the  
198 target band. To estimate the amount of buccal and intestinal DNA, a series of human  
199 placental DNA (Sigma-Aldrich, St. Louis, MO, USA) at concentrations of 500, 300, and  
200 100 pg/μL were used as reference controls. When the luminous intensity of a PCR  
201 product was > 300 pg/μL of the control, the sample was considered to have sufficient  
202 yield and was used in the next step for microsatellite amplification. We used human  
203 placental DNA as a reference as following Kawamoto et al. (2013), that was different  
204 from the *Macaca leonina*'s DNA used in the real-time PCR. This was because of the  
205 difference of availability of the DNA standard in Japan and Thailand, and the difference  
206 of the species was considered not to affect the substantial results (Smith et al. 2002).  
207 The accuracy of the real-time PCR analysis and gel test screening were compared using  
208 the Wilcoxon rank sum test with continuity correction.

209

210 *DNA quality analysis*

211 To determine DNA quality, the 30 paired buccal and intestinal DNA samples that passed  
212 the gel test were randomly selected for microsatellite genotyping. Ten microsatellite loci  
213 (D3S1768, D6S2793, D7S2004, D8S1106, D11S2002, D13S765, D14S306, D17S1290,  
214 D18S537, and D19S582; Aarmink et al. 2011, Barelli et al. 2013, Kawamoto et al. 2008,  
215 Nair et al. 2000, Smith et al. 2000) were amplified using a modified version of the  
216 two-step multiplex method described by Arandjelovic et al. (2009). During the first step  
217 of PCR, all microsatellite loci were amplified in a single 20  $\mu$ L reaction that included 1  
218  $\mu$ L template DNA. During the second step, the 10 loci were divided into three subsets  
219 and were amplified in 12.5  $\mu$ L multiplex PCR reactions that each included 1  $\mu$ L of  
220 non-diluted amplicon from the first multiplex PCR reaction. The PCR thermocycling  
221 conditions were the same as those from the gel test, except that 35 cycles were used for  
222 the first PCR, and 45 for the second PCR. Allelic dropout rates and false allele rates  
223 were calculated using PEDANT Ver.1 (Johnson and Haydon 2007, available from  
224 <http://sites.google.com/site/pcdjohnson/home/pedant>). In the program, the results of two  
225 independent PCR products per sample per locus were used to estimate the allelic  
226 dropout and false allele rates. The allelic dropout and false allele rates of the buccal and  
227 fecal sample DNA were compared using the Wilcoxon signed-rank test ( $p < 0.05$ ) in R.  
228 In addition, the genotype failure rate (a phenomenon in which the peak of an allele is

229 detected at extremely low levels or is not detected) of each locus was calculated based  
230 on the duplicated PCR results, and the genotype failure rates of the buccal and fecal  
231 DNA samples were compared using the Wilcoxon signed-rank test ( $p < 0.05$ ) in R.

232

## 233 **Results**

### 234 *DNA quantity*

235 Analysis of the 82 DNA samples (41 buccal and 41 intestinal DNA samples) revealed  
236 that the buccal samples yielded significantly more host DNA ( $27.1 \pm 33.8$  ng/ $\mu$ L) than  
237 did the fecal samples ( $11.4 \pm 15.4$  ng/ $\mu$ L;  $W = 473$ ,  $P < 0.001$ ). Although 68% (28/41)  
238 of intestinal samples yielded concentrations less than 10 ng/ $\mu$ L, only 29% of buccal  
239 samples produced such low concentrations (12/41) (Figure 3).

240         The determination by the gel test was possibly made the presence/absence of  
241 the band (Figure 5, as an example of gel-test judgment). Of the 41 fecal and buccal  
242 DNA samples tested, 22 (53.7%) and 35 (85.4%) met the criterion for sufficient yield ( $\geq$   
243 300 pg/ $\mu$ l), respectively. The concentration of host DNA that passed and failed the gel  
244 tests as measured by real-time PCR was a significant difference ( $W = 991$ ,  $p < 0.01$ ),  
245 indicating that either real-time PCR or the gel test can be used for DNA quantification.

246

247 *DNA quality*

248 For the 30 monkeys whose samples passed the gel test, the allelic dropout rate of the 10  
249 microsatellite loci was significantly lower for the buccal (0.00%, range:  $0.00 - 6 \times$   
250  $10^{-6}$  %) than for the fecal DNA samples ( $18.12 \pm 16.12\%$ , range: 0.00–55.96%;  
251 Wilcoxon signed-rank test,  $V = 44$ ,  $p < 0.01$ ; Table 1). Estimated dropout rates were  
252 used to calculate the amount of repetition necessary for accurate results at the 99.99%  
253 certainty level (Morin et al. 2001). At least 6 repetitions were needed for fecal sample  
254 analysis to produce reliable genotype data, whereas one repetition was sufficient for  
255 buccal samples.

256 Similarly, the genotyping failure rate was significantly lower for buccal DNA  
257 samples ( $2.70\% \pm 3.88$ , range: 0.0–13.3 %) than for fecal DNA samples ( $35.67\% \pm$   
258  $15.35$ , range: 18.3–65.0%; Wilcoxon signed-rank test,  $V = 55$ ,  $p < 0.01$ ), although the  
259 rate was variable among the loci examined (Table 1).

260

261 **Discussion**

262 *Advantages from sampling point of view*

263 When fecal sample are used as genetic resources, the success depends largely on the  
264 skill of the collector, the state of the feces, and other factors. Using the rope swab

265 method in our study, the collection of high-quantity and quality DNA samples would be  
266 possible without much training, providing a more versatile option that is not dependent  
267 heavily on the level of experience of the sample collector. Our rope swab method may  
268 also be useful for collecting samples from infants. Indeed, our method was capable of  
269 collecting samples from infants aged 2–3 weeks, even though the feces of infants were  
270 often soft, diarrhea-like or very small and often difficult or almost impossible to collect.  
271 Thus, we strongly believe that our method would be a powerful alternative to overcome  
272 the difficulty of collecting fecal samples from infants which are indispensable for  
273 genetic analysis such as paternity test. The rope swab method is also less time  
274 consuming than fecal collection. Since the quality of DNA samples cannot be checked  
275 in-situ study, multiple fecal samples must be collected to ensure collection of an  
276 adequate sample from the target animals. On the other hand, most of buccal samples  
277 provided usable DNA, and thus, fewer specimens need to be collected from each animal.  
278 Additionally, to collect fecal samples, researchers must patiently follow the targeted  
279 animals until they defecate, which is time-consuming. Therefore, the rope swab method  
280 presented in this study has great potential to save time and mitigate these factors.

281

282 *Advantages from analysis point of view*

283           Our study showed that the rope swab method is more effective, in terms of both  
284   quantity and quality of recovered DNA, compared to extraction from fecal samples. The  
285   rope swab method yielded up to 2.4 times more host DNA than did fecal samples and  
286   exhibited much lower allelic dropout and genotype failure rates, indicating that our  
287   method possibly facilitates genotyping analyses with fewer repetitive PCR trials, which  
288   could save time, labor, and money. This is because low DNA quantity increases  
289   genotyping errors that affect the reliability of genotyping in microsatellite analysis  
290   (Taberlet et al. 1999), and thus repeating experiments for each locus and extract is  
291   recommended (Goossens et al. 1998).

292

293   *Important notice using rope swab method*

294           Although our method would be useful, there are several cautionary notes while  
295   collecting samples. Firstly, in the initial phase, monkeys may not chew on the rope  
296   swabs. In this case, a habituation period using fruit juice instead of sugar water to  
297   increase the attractiveness of the swab rope is recommended. From experience, however,  
298   it seems better to switch to sugar water during the sample-collection phase. Genotyping  
299   results were not stable when using DNA samples collected with orange juice, probably  
300   due to the acid or other chemical compounds present in the fruit juice.



301           Secondly, the collection of samples shortly after monkeys have consumed food  
302   should be avoided, especially at provisioned sites or when targeting captive animals, as  
303   fruits are the main food items given and contain acids or other chemical compounds that  
304   may inhibit PCR. Complex polysaccharides possibly originating from vegetable  
305   material in the diet are also considered potential PCR inhibitors (Monteiro et al. 1997).  
306   Thus, time of sampling may affect the quality of the sample rather than the duration for  
307   which the monkey chews the rope.

308           Thirdly, adjustments to the soaking time of the rope swab in the sugar-water  
309   solution and the concentration of sugar according to the condition of the subject animals  
310   or study site may be needed. Extended soaking times or high sugar concentrations could  
311   encourage monkeys to chew the rope swabs for longer periods, which may lead to  
312   greater DNA yields. However, the potential downside of a longer chewing period is that  
313   the target monkeys may move while chewing, making retrieval of the rope swabs more  
314   difficult for the researcher. Although some individuals spent significant time chewing  
315   the swabs and occasionally broke them into small fragments, no monkeys accidentally  
316   ate the rope swabs during this study period, demonstrating their safety in application.

317           Fourth, the rope swabs should be well-distributed among the troop, otherwise  
318   higher-ranking males will take multiple ropes at once. When samples from subordinate

319 individuals are needed, spreading the rope swabs over a wide area to attract  
320 high-ranking individuals, and then casting some swabs to the target individual may be  
321 an effective strategy.

322           Lastly, because this method requires that the rope swabs be provided to the  
323 animals, it may not be suitable for use with non-habituated, wild animals. This method  
324 also cannot be used in research sites where access to wildlife or provisioning is  
325 prohibited. Since this method involves material once contained in the mouths of animals,  
326 researchers must be aware of the possibility of touching saliva to prevent zoonosis (e.g.,  
327 Kelesidis and Tsiodras 2010). When conducting behavioral observation at the same time,  
328 the possibility of influencing the behavior of the target animals must also be considered.  
329 Ultimately, the applicability of this method will depend on the specific needs and  
330 conditions of the research.

331           Furthermore, we must note about the standard range of quantitative real-time  
332 PCR. In this study, the standard range of quantitative real-time PCR could not cover the  
333 sample concentration range due to the fact that the quantity of DNA was extracted at a  
334 higher concentration than our assumption. We followed the protocol of Wizard SV Gel  
335 and PCR Clean-Up System and used 50  $\mu$ L of water for the final elution step, though  
336 200  $\mu$ L is used in Morin et al. (2001). This difference of the final elution volume should

337 have resulted in the higher concentration of DNA both from buccal and fecal samples in  
338 our study.

339

#### 340 *Future possibility of application*

341 The successful DNA collection and genotyping of *M. arctoides* using our method can be  
342 further applied to different conditions, for example, for populations kept in captive  
343 conditions at research institutions or individuals kept in cages in laboratories but also  
344 for provisioned or well-habituated free-ranging primates such as populations living near  
345 temples which are widely seen in most Southeast Asian countries, as long as researchers  
346 pay attention to risks and take precautions. This is a very useful method for researchers  
347 who have to obtain samples from specific individuals in a limited research period in the  
348 wild. Furthermore, with some modifications, this method can be applied for hormone  
349 and veterinary analysis (e.g., detecting a specific virus in the saliva; Musso et al. 2015,  
350 Huff et al. 2003). The non-invasive buccal cell collection method described by this  
351 study may further facilitate animal population genomic studies in both captive and field  
352 environments. Further integration of genetic information with behavioral and ecological  
353 data is expected to provide more insights into *M. arctoides*, including genetic structure  
354 and socioecological characteristics such as reproductive strategy and kinship structure.

355

356 **References**

- 357 Aarnink A, Dereuddre-Bosquet N, Vaslin B, Le Grand R, Winterton P, Apoil PA,  
358 Blancher A (2011) Influence of the MHC genotype on the progression of  
359 experimental SIV infection in the Mauritian cynomolgus macaque. *Immunogenetics*  
360 63:267-274
- 361 Arandjelovic M, Guschanski K, Schubert G, Harris TR, Thalmann O, Siedel H, Vigilant  
362 L (2009) Two-step multiplex polymerase chain reaction improves the speed and  
363 accuracy of genotyping using DNA from noninvasive and museum samples.  
364 *Molecular Ecology Resources* 9:28-36
- 365 Avise JC (2004) *Molecular markers, natural history, and evolution*, Second Edition.  
366 Sinauer Associates, Inc., MA, USA.
- 367 Ball MC, Pither R, Manseau M, Clark J, Petersen SD, Kingston S, Morrill N, and  
368 Wilson P (2007) Characterization of target nuclear DNA from faeces reduces  
369 technical issues associated with the assumptions of low-quality and quantity  
370 template. *Conservation Genetics* 8:577-586
- 371 Barelli C, Matsudaira K, Wolf T, Roos C, Heistermann M, Hodges K, Ishida T,  
372 Malaivijitnond S, Reichard UH (2013) Extra-pair paternity confirmed in wild

- 373 white-handed gibbons. *American Journal of Primatology* 75:1185-1195
- 374 Blair ME, Melnick DJ (2011) Genetic evidence for dispersal by both sexes in the central  
375 American squirrel monkey, *Saimiri oerstedii citrinellus*. *American Journal of*  
376 *Primatology* 74:37-47
- 377 Blancher A, Bonhomme M, Crouau-Roy B, Terao K, Kitano T, Saitou N (2008)  
378 Mitochondrial DNA sequence phylogeny of 4 populations of the widely distributed  
379 cynomolgus macaque (*Macaca fascicularis fascicularis*). *Journal of Heredity*  
380 99:254-264
- 381 Bruford MW, Wayne RK (1993) Microsatellites and their application to population  
382 genetic studies. *Current Opinion in Genetics and Development* 3:939-943
- 383 Brumfield RT, Beerli P, Nickerson DA, Edwards SV (2003) The utility of single  
384 nucleotide polymorphisms in inferences of population history. *Trends in*  
385 *Ecology and Evolution* 18:249-256
- 386 Buchan JC, Alberts SC, Silk JB, Altmann J (2003) True paternal care in a multi-male  
387 primate society. *Nature* 425:179-181
- 388 Bunlungsup S, Imai H, Hamada Y, Gumert MD, San AM, Malaivijitnond S (2016)  
389 Morphological characteristics and genetic diversity of Burmese longtailed

- 390 macaques (*Macaca fascicularis aurea*). American Journal of Primatology  
391 74:441-455
- 392 Domingo-Roura X, Marmi J, Andrés O, Yamagiwa J, Terradas J (2004) Genotyping  
393 from semen of wild Japanese macaques (*Macaca fuscata*). American Journal of  
394 Primatology 62:31-42
- 395 Egloff C, Labrosse A, Hebert C, Crump D (2009) A nondestructive method for obtaining  
396 maternal DNA from avian eggshells and its application to embryonic viability  
397 determination in herring gulls (*Larus argentatus*). Molecular Ecology Resources  
398 9:19-27
- 399 Ejiri H, Sato Y, Kim KS, Hara T, Tsuda Y, Imura T, Murata K, Yukawa M (2011)  
400 Entomological study on transmission of avian malaria parasites in a zoological garden  
401 in Japan: bloodmeal identification and detection of avian malaria parasite DNA from  
402 blood-fed mosquitoes. Journal of Medical Entomology. 48:600-607
- 403 Evans BJ, Supriatna J, Melnick DJ (2001) Hybridization and population genetics of two  
404 macaque species in Sulawesi, Indonesia. Evolution 55:1686-1702
- 405 Goossens B, Waits LP, Taberlet P (1998) Plucked hair samples as a source of DNA:  
406 reliability of dinucleotide microsatellite genotyping. Molecular Ecology  
407 7:1237-1241

- 408 Hashimoto C, Furuichi T, Takenaka O (1996) Matrilineal kin relationship and social  
409 behavior of wild bonobos (*Pan paniscus*): sequencing the D-loop region of  
410 mitochondrial DNA. *Primates* 37:305-318
- 411 Hayakawa S, Takenaka O (1999) Urine as another potential source for template DNA in  
412 polymerase chain reaction (PCR). *American Journal of Primatology* 48:299-304
- 413 Hayaishi H, Kawamoto Y (2006) Low genetic diversity and biased distribution of  
414 mitochondrial DNA haplotypes in the Japanese macaque (*Macaca fuscata yakui*) on  
415 Yakushima Island. *Primates* 47:158-164
- 416 Huff JL, Eberle R, Capitanio J, Zhou SS, Barry PS (2003) Differential detection of B  
417 virus and rhesus cytomegalovirus in rhesus macaques. *Journal of General Virology*  
418 84:83-92
- 419 Inoue E, Inoue-Murayama M, Takenaka O, Nishida T (2007) Wild chimpanzee infant  
420 urine and saliva sampled noninvasively usable for DNA analyses. *Primates*  
421 48:156-159
- 422 Ishizuka S, Kawamoto Y, Toda K, Furuichi T (2018) Bonobos' saliva remaining on the  
423 pith of terrestrial herbaceous vegetation can serve as non-invasive wild genetic  
424 resources. *Primates* 60:7-13
- 425 Johnson PCD, Haydon DT (2007) Maximum-likelihood estimation of allelic dropout

426 and false allele error rates from microsatellite genotypes in the absence of reference  
427 data. *Genetics* 175:827-842

428 Kanthaswamy S, Ng J, Trask JS, George DA, Kou AJ, Hoffman LN, Doherty TB,  
429 Houghton P, Smith DG (2013) The genetic composition of populations of  
430 cynomolgus macaques (*Macaca fascicularis*) used in biomedical research. *Journal*  
431 *of Medical Primatology* 42:120-131

432 Kawamoto Y, Kawamoto S, Matsubayashi K, Nozawa K, Watanabe T, Stanley MA,  
433 Perwitasari-Farajallah D (2008) Genetic diversity of longtail macaques (*Macaca*  
434 *fascicularis*) on the island of Mauritius: an assessment of nuclear and mitochondrial  
435 DNA polymorphisms. *Journal of Medical Primatology* 37:45-54

436 Kawamoto Y, Takemoto H, Higuchi S, Sakamaki Tart JA, Hart TB, Tokuyama N,  
437 Reinartz GE, Guislain P, Dupain J, Cobden AK, Mulavwa MN, Yangozene K,  
438 Darroze S, Devos C, Furuichi T (2013) Genetic structure of wild bonobo  
439 populations: diversity of mitochondrial DNA and geographical distribution. *PLoS*  
440 *ONE* 8:e59660

441 Kelesidis T, Tsiodras S (2010) *Staphylococcus intermedius* is not only a zoonotic  
442 pathogen, but may also cause skin abscesses in humans after exposure to saliva.  
443 *International Journal of Infectious Diseases* 14:838-841



- 444 Minhós T, Wallace E, Ferreira da Silva MJ, Sa RM, Carmo M, Barata A, Bruford MW  
445 (2013) DNA identification of primate bushmeat from urban markets in Guinea-Bissau  
446 and its implications for conservation. *Biological Conservation* 167:43-49
- 447 Monteiro L, Bonnemaïson D, Vekris A, Petry KG, Bonnet J, Vidal R, Cabrita J,  
448 Mégraud F (1997) Complex polysaccharides as PCR inhibitors in feces *Helicobacter*  
449 *pylori* model. *Journal of Clinical Microbiology* 35:995-998
- 450 Morin PA, Chambers KE, Boesch C, Vigilant L (2001) Quantitative polymerase chain  
451 reaction analysis of DNA from noninvasive samples for accurate microsatellite  
452 genotyping of wild chimpanzees (*Pan troglodytes verus*). *Molecular Ecology*  
453 10:1835-1844
- 454 Musso D, Roche C, Nhan TX, Robin E, Teissier A, Cao-Lormeau VM (2015) Detection  
455 of Zika virus in saliva. *Journal of Clinical Virology* 68:53-55
- 456 Nair S, Ha J, Rogers J (2000) Nineteen new microsatellite DNA polymorphisms in  
457 pigtailed macaques (*Macaca nemestrina*). *Primates* 41:343-350
- 458 Navidi W, Arnheim N, Waterman MS (1992) A multiple-tubes approach for accurate  
459 genotyping of very small DNA samples by using PCR: statistical considerations.  
460 *The American Journal of Human Genetics* 50:347-359
- 461 Nietlisbach P, Arora N, Nater A, Goossens B, Van Schaik CP, Krützen M (2012)

- 462 Heavily male-biased long-distance dispersal of orang-utans (genus: *Pongo*), as  
463 revealed by Y-chromosomal and mitochondrial genetic markers. *Molecular Ecology*  
464 21:3173-3186
- 465 Osada N, Hettiarachchi N, Babarinde IA, Saitou N, Blancher A (2015) Whole-genome  
466 sequencing of six Mauritian cynomolgus macaques (*Macaca fascicularis*) reveals a  
467 genome-wide pattern of polymorphisms under extreme population bottleneck.  
468 *Genome Biology and Evolution* 7:821-830
- 469 Pidancier N, Miquel C, Miaud C (2003) Buccal swabs as a non-destructive tissue  
470 sampling method for DNA analysis in amphibians. *Herpetological Journal*  
471 13:175-178
- 472 Pompanon F, Bonin A, Bellemain E, Taberlet P (2005) Genotyping errors: causes,  
473 consequences and solutions. *Nature Reviews Genetics* 6:847-846
- 474 R Core Team (2016) R: a language and environment for statistical computing. R  
475 Foundation for Statistical Computing, Vienna, Austria. URL  
476 <https://www.R-project.org/>.
- 477 Rovie-Ryan JJ, Zainuddin ZZ, Marni W, Ahmad AH, Ambu LN, Payne J (2013) Blood  
478 meal analysis of tabanid fly after it biting the rare Sumatran rhinoceros. *Asian*  
479 *Pacific Journal of Tropical Biomedicine* 3:95-99

- 480 Russell WMS, Burch RL (1959) *The Principles of Humane Experimental Technique*.  
481 Methuen, London. ([http://altweb.jhsph.edu/pubs/books/humane\\_exp/het-toc](http://altweb.jhsph.edu/pubs/books/humane_exp/het-toc))  
482 Accessed December 18, 2017)
- 483 Simons ND, Lorenz JG, Sheeran LK, Li JH, Xia DP, Wargner RS (2012) Noninvasive  
484 saliva collection for DNA analyses from free-ranging Tibetan macaques (*Macaca*  
485 *thibetana*). *American Journal of Primatology* 74:1064-1070
- 486 Smiley T, Spelman L, Lukasik-Braum M, Mukherjee J, Kaufman G, Akiyoshi DE,  
487 Cranfield M (2010) Noninvasive saliva collection techniques for free-ranging  
488 mountain gorillas and captive eastern gorillas. *Journal of Zoo and Wildlife Medicine*  
489 1:201-209
- 490 Smith DG, Kanthaswamy S, Viray J, Cody L (2000) Additional highly polymorphic  
491 microsatellite (STR) loci for estimating kinship in rhesus macaques (*Macaca*  
492 *mulatta*). *American Journal of Primatology* 50:1-7
- 493 Smith S, Vigilant L, Morin PA (2002) The effect of sequence length and oligonucleotide  
494 mismatches on 5' exonuclease assay efficiency. *Nucleic Acids Research* 30:e111
- 495 Städele V, van Doren V, Pines M, Swedell L, Vigilant L (2015) Fine-scale genetic  
496 assessment of sex-specific dispersal patterns in a multilevel primate society. *Journal*  
497 *of Human Evolution* 78:103-113

- 498 Taberlet P, Griffin S, Goossens B, Questiau S, Manceau V, Escaravage N, Waits LP,  
499 Bouvet J (1996) Reliable genotyping of samples with very low DNA quantities  
500 using PCR. *Nucleic Acids Research* 24:3189-3194
- 501 Taberlet P, Waits L.P., Luikart G (1999) Noninvasive genetic sampling: look before you  
502 leap. *Trends in Ecology and Evolution* 14:323-327.
- 503 Tebbutt S, Ruan J (2008) Combining multiple PCR primer pairs for each amplicon can  
504 improve SNP genotyping accuracy by reducing allelic drop-out. *Biotechniques*  
505 45:637-646
- 506 Tosi AJ, Morales JC, Melnick DJ (2000) Comparison of Y-chromosome and mtDNA  
507 phylogenies leads to unique inferences of macaque evolutionary history. *Molecular*  
508 *Phylogenetics and Evolution* 17:133-144
- 509 Tosi AJ, Morales JC, Melnick DJ (2002) Y-chromosome and mitochondrial markers in  
510 *Macaca fascicularis* indicate introgression with Indochinese *M. mulatta* and a  
511 biogeographic barrier in the Isthmus of Kra. *International Journal of Primatology*  
512 23:161-178
- 513 Trask JS, George D, Houghton P, Kanthaswarry S, Smith DG (2013) Population and  
514 landscape genetics of an introduced species (*M. fascicularis*) on the island of  
515 Mauritius. *PLoS One* 8:e53001-10.1371/journal.pone.0053001

- 516 Vigilant L, Hofreiter M, Siedel H, Boesch C (2001) Paternity and relatedness in wild  
517 chimpanzee communities. *Proceedings of the National Academy of Sciences of the*  
518 *United States of America* 98:12890-12895
- 519 Wang W, Qiao Y, Zheng Y, Yao M (2016) Isolation of microsatellite loci and reliable  
520 genotyping using noninvasive samples of a critically endangered primate,  
521 *Trachypithecus leucocephalus*. *Integrative Zoology* 11:250-262
- 522 Wedrowicz F, Karsa M, Mosse J, Hogan FE (2013) Reliable genotyping of the koala  
523 (*Phascolarctos cinereus*) using DNA isolated from a single faecal pellet. *Molecular*  
524 *Ecology Resources* 13:634-641
- 525 Woodruff DS (1993) Non-invasive genotyping of primates. *Primates* 33:333-346
- 526

527 Table 1. Allelic dropout and genotype failure rates of 10 microsatellite loci for fecal and  
528 buccal DNA samples of stump-tailed macaques in Khao Krapuk Khao Taomor.

| Loci     | Allelic dropout rate (%) |        | Genotype failure rate (%) |        |
|----------|--------------------------|--------|---------------------------|--------|
|          | Fecal                    | Buccal | Fecal                     | Buccal |
| D3S1768  | 10.54                    | 0.00   | 38.33                     | 0.00   |
| D6S2793  | 25.00                    | 0.00   | 58.33                     | 2.00   |
| D7S2204  | 8.80                     | 0.00   | 31.67                     | 13.33  |
| D8S1106  | 13.04                    | 0.00   | 45.00                     | 0.00   |
| D11S2002 | 0.00                     | 0.00   | 65.00                     | 1.67   |
| D13S765  | 29.20                    | 0.00   | 23.33                     | 0.00   |
| D14S306  | 0.00                     | 0.00   | 18.33                     | 1.67   |
| D17S1290 | 28.45                    | 0.00   | 33.33                     | 5.00   |
| D18S537  | 55.97                    | 0.00   | 25.00                     | 3.33   |
| D19S582  | 10.21                    | 0.00   | 18.33                     | 0.00   |

529

530 Figure

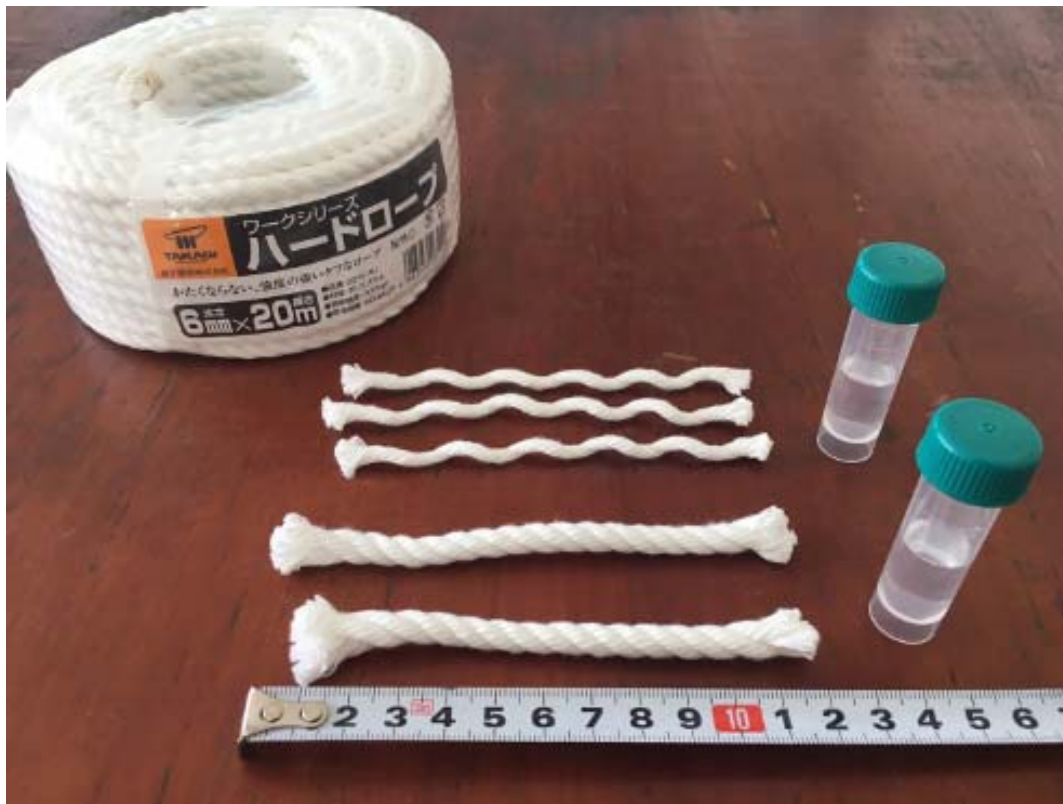

531

532 **Fig 1** Rope swabs cut into 10cm length and 3ml of lysis buffer in 5ml tube

533

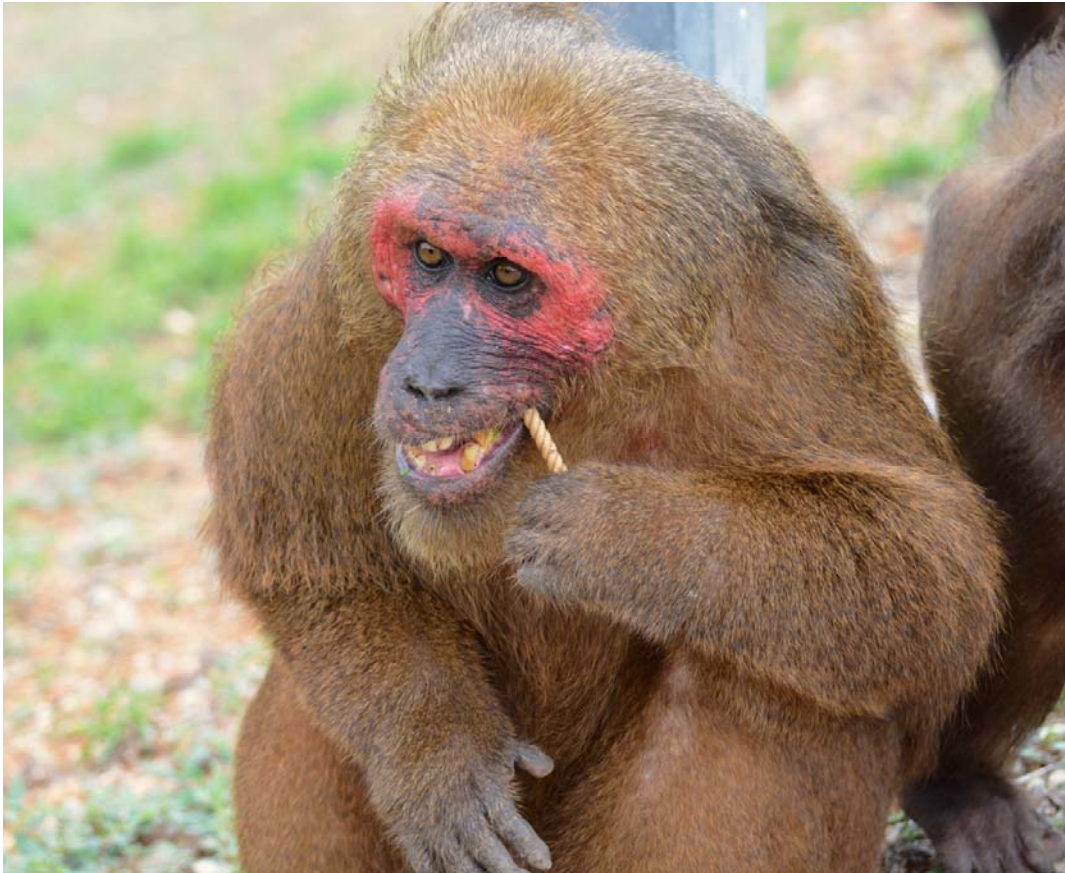

534

535 **Fig 2** Monkey chewing a rope swab



536

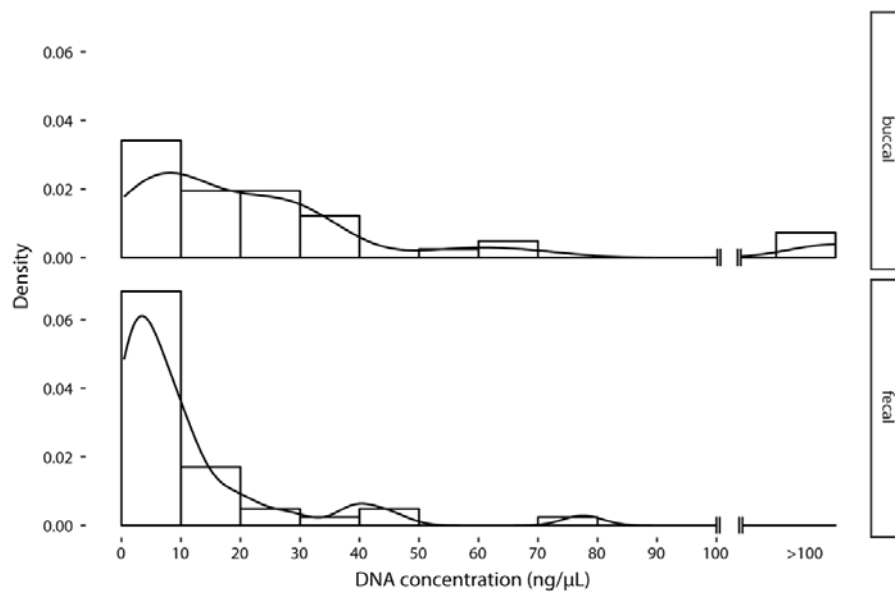

537

538 **Fig 3** Frequency of buccal and fecal DNA in each DNA concentration zone. Although

539 many fecal samples are dense in the low concentration zone, meaning that the sampling

540 efficiency is not good, buccal samples shows a gentle peak overall, indicating that

541 samples with high concentration can be more easily obtained.
